# Supplementary material for: Proteomic evidence of dietary sources in ancient dental calculus
Source: Proc Biol Sci. 2018 Jul 18;285(1883):20180977. doi: 10.1098/rspb.2018.0977 (PMC6083251; doi:10.1098/rspb.2018.0977)
Supplement: Supplementary Table 1 [file rspb20180977supp2.xlsx]

## Sheet: Sheet2
Site	Sample ID	Sample Weight (mg)	Extraction Method	Location of Extraction	Location of MS/MS Analysis	Proteomic Data ID	New or Previously Published Dataset
Modern
University of Tenneesee Forensic Anthropology Center	UT103-10D	21.17	FASP (pellet)	BioArCh, Department Archaeology, University of York	TDI, Oxford	103P	New
			FASP (supernatant)			103S
	UT111-07	18.93	FASP (pellet)			111P
			FASP (supernatant)			111S
	UT116-10D	25.04	FASP (pellet)			116P
			FASP (supernatant)			116S
	UT73-08D	25.69	FASP (pellet)			73P
			FASP (supernatant)			73S
	UT-eBK	Extraction Blank	FASP			Blank
Oklahoma Dental Patients	OU1001	4.6	FASP	LMAMR, Oklahoma University	FGCZ, Zurich	Z81	New
	OU1002	1.3	FASP			Z82
	OU1003	1.1	FASP			Z83
	OU1004	1.6	FASP			Z84
	OU1004	2.4	GASP			Z94
	OU1005	3.7	FASP			Z85
	OU1006	5.9	FASP			Z86
	OU1007	4.2	FASP			Z87
	OU1008	3.1	FASP			Z88
	OU1009	3.2	FASP			Z89
	OU1010	2.3	FASP			Z90
	OU1010	3.1	GASP			Z100
Post-Medieval
Church of St Michael and St Lawrence, Fewston, North Yorkshire (SE 1947 5411)	FW9	1.7	GASP	LMAMR, Oklahoma University	TDI, Oxford	FW9	New
	FW68	41.7	GASP			FW68
	FW88	10	GASP			FW88
	FW98	24.8	GASP			FW98
	FW192	9.3	GASP			FW192
	FW217	13.1	GASP			FW217
	FW268	10.5	GASP			FW268
	FW303	6.3	GASP			FW303
	FW331	2.2	GASP			FW331
	FW450	46.4	GASP			FW450
	Blank	Extraction Blank	GASP			Blank
	FW435	21.7	FASP	BioArCh, Department Archaeology, University of York	TDI, Oxford	CS23	Previously published dataset: PXD001362
	FW53	51.9	FASP			CS24
Christ Church, Spitalfields, London	SP2182	27.4	GASP	BioArCh, Department Archaeology, University of York	TDI, Oxford	SP2182	New
	SP2295	17.3	GASP			SP2295
	SP2300	17.7	GASP			SP2300
	SP2301	22.6	GASP			SP2301
	SP2369	36.1	GASP			SP2369
	SP2468	13.6	GASP			SP2468
	SP2477	11	GASP			SP2477
	SP2484	7.2	GASP			SP2484
	SP2647	10.5	GASP			SP2647
	SP2748	25.8	GASP			SP2748
	SP2860	24.9	GASP			SP2860
	SP-eBK	Extraction Blank	GASP			Blank
St Barnabas/St Mary Abbots, West Kensington	STB 21	12.7	GASP	BioArCh, Department Archaeology, University of York	TDI, Oxford	STB 21	New
Radcliffe Infirmary, Oxfordshire	CS6	<40 mg	GASP	Palaeogenomics and Bioarchaeology Research Network, University of Oxford	TDI, Oxford	CS6	New
	CS7	<40 mg	GASP			CS7
	CS11	<40 mg	GASP			CS11
	CS12	<40 mg	GASP			CS12
	CS18	<40 mg	GASP			CS18
	CS19	<40 mg	GASP			CS19
	CS21	<40 mg	GASP			CS21
	CS31	<40 mg	GASP			CS31
	CS40	<40 mg	GASP			CS40
	CS46	<40 mg	GASP			CS46
	CSPN2	Extraction Blank	GASP			CSPN2
Royal London Hospital (RLP05)	RLH 103	4.43	GASP	BioArCh, Department Archaeology, University of York	TDI, Oxford	RLH 103	New
	RLH 131	29.6	GASP			RLH 131
	RLH 135	4.4	GASP			RLH 135
	RLH 208	58.9	GASP			RLH 208
	RLH 340	27.8	GASP			RLH 340
	RLH 349	27.6	GASP			RLH 349
	RLH 365	21.8	GASP			RLH 365
	RLH 367	24.4	GASP			RLH 367
	RLH 386	6.9	GASP			RLH 386
	RLH 397	9.9	GASP			RLH 397
	RLH 421	28.3	GASP			RLH 421
	RLH 572	23.5	GASP			RLH 572
	RLH-BK	Extraction Blank	GASP			RLH-BK
Lower St Bride’s Churchyard, London (FAO90)	SK1203	13	GASP	BioArCh, Department Archaeology, University of York	TDI, Oxford	FAO1	New
	SK1207	15.1	GASP			FAO2
	SK1215	13.4	GASP			FAO3
	SK1244.1	31.6	GASP			FAO4
	SK1526	12	GASP			FAO5
	SK1558	34	GASP			FAO6
	SK1641	8.3	GASP			FAO7
	SK1653	7.5	GASP			FAO8
	SK1655	13.5	GASP			FAO9
	SK1683	15.4	GASP			FAO10
	SK1785	13.4	GASP			FAO11
	SK1799	10.8	GASP			FAO12
	SK1872	17.4	GASP			FAO13
	SK1932	16.7	GASP			FAO14
	SK1999	20.6	GASP			FAO15
	SK2049	15.8	GASP			FAO16
	SK2134	11.1	GASP			FAO17
	SK2296	40.3	GASP			FAO18
	FAO-eBK	Extraction Blank	GASP			FAOBK
Medieval
Wighill, North Yorkshire	WG1252	45	FASP	BioArCh, Department Archaeology, University of York	TDI, Oxford	WG1252	Previously published dataset PXD001362
	WG1082	47.3	FASP			WG1082
	WG1566	46.5	FASP			WG1566
	WG1483	41.8	FASP			WG1483
	WG1561	60.6	FASP			WG1561
	WG1585	58.1	FASP			WG1585
	WG-eBK	Extraction Blank	FASP			Neg_9
St. Mary’s Church, Tickhill, South Yorkshire (NGR SK 592931)	TKAC	11.4	FASP	BioArCh, Department Archaeology, University of York	TDI, Oxford	CS19	New
	TKDC	29.9	FASP			CS20
	TKEC	25.7	FASP			CS21
	TKFC	20	FASP			CS22
Viking
16-22 Coppergate, York, North Yorkshire (SE 605 515)	JV15548	46.8	FASP	BioArCh, Department Archaeology, University of York	TDI, Oxford	CS12	New
Anglo-Saxon
Norton-on-Tees, East Mill and Bishopsmill School, County Durham	NEM18	76.9	FASP	BioArCh, Department Archaeology, University of York	TDI, Oxford	CS13	Previously published dataset PXD001362
	NEM093	60	FASP			CS14
	NEM099	63	FASP			CS15
	NBS410	74.5	FASP			CS16
	NBS262	51.5	FASP			CS17
	NBS325	62.3	FASP			CS18
	NEG31/7	Extraction Blank	FASP			CS30
Roman
Oxford Street, Leicestershire (NGR SK 586038)	OX01	14.8	FASP	BioArCh, Department Archaeology, University of York	TDI, Oxford	OX01	Previously published dataset PXD001362
	OX03	27.9	FASP			OX03
	OX04	27.5	FASP			OX04
	OX05	48.9	FASP			OX05
	OX06	16.2	FASP			OX06
	OX09	41.2	FASP			OX09
	OX10	35.6	FASP			OX10
	OX12	46.5	FASP			OX12
	OX-eBK	Extraction Blank	FASP			Neg_14
3 & 6 Driffield Terrace, York, North Yorkshire (NGR SE 59324510 & NGR SE 59285095)	3DT26	35	FASP	BioArCh, Department Archaeology, University of York	TDI, Oxford	CS5	Previously published dataset PXD001362
	3DT21	59.2	FASP			CS6
	6DT3	32.8	FASP			CS7
	6DT7	45.5	FASP			CS8
	6DT21	19	FASP			CS9
	NEG29/7	Extraction Blank	FASP			CS29
Heslington East, York, North Yorkshire (NGR SE 640 506)	HE1987	64	FASP	BioArCh, Department Archaeology, University of York	TDI, Oxford	CS10	New
	HE2000	64.5	FASP			CS11
Bronze/Iron Age
Melton (NGR SE 97550 26420)	ML1489	34.7	FASP	BioArCh, Department Archaeology, University of York	TDI, Oxford	CS1	Previously published dataset PXD001362
	ML1823	36.2	FASP			CS2
	ML3890	26.2	FASP			CS3
	ML1032	25.7	FASP			CS4
