# Supplementary material for: Proteomic evidence of dietary sources in ancient dental calculus
Source: Proc Biol Sci. 2018 Jul 18;285(1883):20180977. doi: 10.1098/rspb.2018.0977 (PMC6083251; doi:10.1098/rspb.2018.0977)
Supplement: Supplementary Table 2 [file rspb20180977supp3.xlsx]

## Sheet: Sheet1
Period	Archaeological Site	Region	Sample ID	Repository	Repository ID	Age	Sex	Reference
Iron Age	Melton (NGR SE 97550 26420)	East Yorkshire	ML1489 (CS1)	University of York	SK1489	26-35 years	Female	Fenton-Thomas C. 2011 Where Sky and Yorkshire and Water Meet: The Story of the Melton Landscape from Prehistory to the Present. York; Oxford: On-Site Archaeology.
			ML1823 (CS2)		SK1823	36-45 years	Female
			ML3890 (CS3)		SK3890	26-35 years	Female
			ML1032 (CS4)		SK1032	18-25 years	Female
Roman Period	Oxford Street, Leicester (NGR SK 586038)	Leicestershire	OX01	York Archaeological Trust	SK1	9-12 years	Unknown	Keefe K, Holst M. 2013 Osteological Analysis, Oxford and Newarke Street, Leicester.
			OX03		SK3	Adult (18+ years)	Probable Female
			OX04		SK4	26-45 years	Female
			OX05		SK5	26-35 years	Male
			OX06		SK6	18-25 years	Male
			OX09		SK9	26-35 years	Female
			OX10		SK10	26-35 years	Male
			OX12		SK12	46+ years	Male
	3 & 6 Driffield Terrace, York (NGR SE 59324510 & NGR SE 59285095)	North Yorkshire	3DT26 (CS5)	York Archaeological Trust	3DT26	36-45 years	Male	Caffell A, Holst M. 2012 Osteological Analysis, 3 and 6 Driffield Terrace, York, North Yorkshire.
			3DT21 (CS6)		3DT21	Probable 36-45 years	Male
			6DT3 (CS7)		6DT3	18-25 years	Male
			6DT7 (CS8)		6DT7	36-45 years	Male
			6DT21 (CS9)		6DT21	Probable 36-45 years	Male
	Heslington East, York (NGR SE 640 506)	North Yorkshire	HE1987	University of York (reburied)	SK1987	Adult (26+ years)	Male	Fotaki A, Holst M. 2014 Osteological Analysis, Heslington East, York.
			HE2000		SK2000	26-35 years	Male
Viking	16-22 Coppergate, York (SE 605 515)	North Yorkshire	JV15548 (CS12)	York Archaeological Trust	1976-81.7 15548 F	46+ years	Female	Hall, R.A., Allen, S.J., Evans, D.T., Hunter-Mann, K., Mainman, A.J., 2014. Anglo-Scandinavian Occupation at 16-22 Coppergate: Defining a Townscape. York Archaeological Trust. Appendix 2: Osteological Analysis by Malin Holst, York Osteoarchaeology Ltd
Anglo-Saxon	Norton-On-Tees, East Mill (NEM)	County Durham	NEM18 (CS13)	York Archaeological Trust	SK018	30-35 years	Male	Sherlock, S. J. & Welch, M. G. An Anglo-Saxon Cemetery at Norton, Cleveland (Council for British Archaeology, York, 1992); Johnson, P. Cemetery Excavations at Bishopmill School, Norton: Post-Excavation Assessment and Analysis (Teesside Archaeology, Cleveland, UK, 2005).
			NEM093 (CS14)		SK093	26-35 years	Male
			NEM099 (CS15)		SK099	17-25 years	Female
	Norton-On-Tees, Bishopsmill School (NBS)		NBS410 (CS16)		SK410	25-40 years	Male
			NBS262 (CS17)		SK262	33-45 years	Female
			NBS325 (CS18)		SK325	33-45 years	Female
Medieval	St. Mary’s Church, Tickhill (NGR SK 592931)	South Yorkshire	TKAC (CS19)	York Archaeological Trust	Tickhill Skull A	46+ years	Female	Caffell, A. & Holst, M. 2012. 'Osteological Analysis, St Mary's Church, Tickhill, South Yorkshire', York Osteoarchaeology, No. 1712
			TKDC (CS20)		Tickhill Skull D	Probable 46+ years	Female
			TKEC (CS21)		Tickhill Skull E	Adult (26+ years)	Male
			TKFC (CS22)		Tickhill Skull F	Adult (18+ years)	Probable Male
	Wighill site,	North Yorkshire	WG1252	York Archaeological Trust	SK1252	46+ years	Female	Unpublished; site report in progress by Mike Griffiths & Associates, D9A The Raylor Centre, James Street, York YO10 3DW, UK
			WG1082		SK1082	46+ years	Male
			WG1566		SK1566	46+ years	Male
			WG1483		SK1483	46+ years	Female
			WG1561		SK1561	19-25 years	Female
			WG1585		SK1585	46+ years	Male
Post-medieval	Royal London Hospital (RLP05)	Greater London	RLH 103	Museum of London	103	26-35 years	Female	Fowler L, Powers N. 2014 Doctors, dissection and resurrection men. MOLA Monograph Series 62
			RLH 131		131	26-35 years	Female
			RLH 135		135	36-45 years	Male
			RLH 208		208	36-45 years	Probable Male
			RLH 340		340	36-45 years	Probable Male
			RLH 349		349	36-45 years	Male
			RLH 365		365	Adult (18+ years)	Probable Male
			RLH 367		367	36-45 years	Male
			RLH 386		386	36-45 years	Probable Female
			RLH 397		397	36-45 years	Female
			RLH 421		421	36-45 years	Male
			RLH 572		572	36-45 years	Male
	Church of St Michael and St Lawrence, Fewston (SE 1947 5411)	North Yorkshire	FW435 (CS23)	Fenwick Human Osteology, Laboratory, Department of Archaeology, Durham University	SK435	Adult (18+ years)	Probable Male	Caffell, A. and Holst, M., (2017). Osteological Analysis, The Church of Saint Michael and Saint Lawrence, Fewston. York Osteoarchaeology Ltd.
			FW53 (CS24)		SJ53	46+ years	Probable Female
			FW9		SK6	18-25 years	Probable Male
			FW68		SK68	46+ years	Male
			FW88		SK88	36-45 years	Male
			FW98		SK98	Adult (18+ years)	Probable Female
			FW192		SK192	18-25 years	Probable Male
			FW217		SK217	14-16 years	Unknown
			FW268		SK268	8.5-10 years	Unknown
			FW303		SK303	18-25 years	Female
			FW331		SK331	12-14 years	Unknown
			FW450		SK450	46+ years	Probable Female
	Lower St Bride’s Churchyard, London (FAO90)	Greater London	FAO1	Museum of London	1203	46+ years	Female	Miles A, Conheeney J. 1990 A Post-medieval population from London: Excavations in the St Bride’s Lower Churchyard. MoLAS Studies Series. Farringdon Street, City of London, EC4.
			FAO2		1207	26-35 years	Female
			FAO3		1215	36-45 years	Probable Female
			FAO4		1244.1	Adult (18+ years)	Male
			FAO5		1526	26-35 years	Male
			FAO6		1558	36-45 years	Male
			FAO7		1641	36-45 years	Female
			FAO8		1653	26-35 years	Female
			FAO9		1655	36-45 years	Unknown
			FAO10		1683	26-35 years	Male
			FAO11		1785	46+ years	Male
			FAO12		1799	36-45 years	Female
			FAO13		1872	36-45 years	Male
			FAO14		1932	36-45 years	Male
			FAO15		1999	26-35 years	Male
			FAO16		2049	36-45 years	Female
			FAO17		2134	26-35 years	Female
			FAO18		2296	46+ years	Male
	Radcliffe Infirmary	Oxfordshire	CS6	Oxford Archaeology	OXIB13 3272	35-44 years	Male	Unpublished report: Radcliffe Infirmary Burial Ground, Oxford Post-excavation assessment and project design By Louise Loe, Mark Pollard, Mark Gibson and Andrew Simmonds with contributions by John Cotter, Alice Parkin, Ian Scott, Ruth Shaffrey and Lena Strid Edited by: Paul Booth Illustrator: Lucy Gane Report Date: November 2014. Oxford Archaeology South.
			CS7		OXIB13 3321	25-34 years	Male
			CS11		OXIB13 3479	18-24 years	Male
			CS12		OXIB13 3488	35-44 years	Male
			CS18		OXIB13 3578	35-44 years	Male
			CS19		OXIB13 3632	35-44 years	Male
			CS21		OXIB13 3889	25-34 years	Male
			CS31		OXIB13 4114	35-44 years	Female
			CS40		OXIB13 4329a	46+ years	Male
			CS46		OXIB13 4457	46+ years	Female
	Christ Church, Spitalfields	Greater London	SP2182	Natural History Museum, London	SK2182	70 years	Male	Molleson T, Cox M, Waldron AH, Whittaker DK. 1993 The Spitalfields Project. Volume 2: The Anthropology - The Middling Sort. CBA Research Report No 86
			SP2295		SK2295	61 years	Female
			SP2300		SK2300	53 years	Female
			SP2301		SK2301	35 years	Female
			SP2369		SK2369	55 years	Female
			SP2468		SK2468	50 years	Male
			SP2477		SK2477	28 years	Female
			SP2484		SK2484	50 years	Female
			SP2647		SK2647	65 years	Female
			SP2748		SK2748	60 years	Female
			SP2860		SK2860	52 years	Female
	St Barnabas/St Mary Abbots, West Kensington	Greater London	STB21	University of York	SK21	73 years	Male	http://archaeologydataservice.ac.uk/archsearch/record?titleId=2826907
