# Supplementary material for: Proteomic evidence of dietary sources in ancient dental calculus
Source: Proc Biol Sci. 2018 Jul 18;285(1883):20180977. doi: 10.1098/rspb.2018.0977 (PMC6083251; doi:10.1098/rspb.2018.0977)
Supplement: Supplementary Table 3 [file rspb20180977supp4.xlsx]

## Sheet: Results Summary
Sample Information		General Protein Identifications						Alpha-amylase	Dietary Protein Information
Period	Sample	Total number of identified proteins (>2 PSMs)	Contaminant Protein families	Human Protein families	Non-Human animal protein families	Plant proteins families	Microbial Protein families	Number of Alpha-amylase 1 (AMY1A) peptides	Dietary Proteins (>2 peptides)	Total Milk Proteins	Beta-Lactoglobulin	Caseins	Non-Milk Animal Proteins	Cereals	Brassicae	Other Plant
Iron Age	ML1489 (CS1)	62	8	9	1	0	38	0	0
Iron Age	ML1823 (CS2)	158	9	17	1	1	114	3	1	1	1
Iron Age	ML3890 (CS3)	52	7	7	0	0	37	0	0
Iron Age	ML1032 (CS4)	109	10	18	1	0	72	0	1	1	1
Roman Period	OX01	96	10	13	1	0	66	0	1	1	1
Roman Period	OX03	79	6	9	0	0	57	0	0
Roman Period	OX04	106	9	7	1	0	79	0	1	1	1
Roman Period	OX05	37	4	4	0	0	28	0	0
Roman Period	OX06	100	6	5	1	0	79	0	0
Roman Period	OX09	38	2	4	0	0	29	0	0
Roman Period	OX10	126	11	20	0	0	73	0	0
Roman Period	OX12	169	10	21	1	0	114	0	1	1	1
Roman Period	3DT26 (CS5)	165	10	17	0	1	120	0	0
Roman Period	3DT21 (CS6)	110	9	4	1	0	85	21	1	1	1
Roman Period	6DT3 (CS7)	186	9	14	0	1	144	0	0
Roman Period	6DT7(CS8)	52	7	9	0	0	30	0	0
Roman Period	6DT21 (CS9)	20	7	0	0	0	10	0	0
Roman Period	HE1987	31	9	6	0	0	9	0	0
Roman Period	HE2000	13	4	0	0	0	3	0	0
Viking	JV15548 (CS12)	132	7	6	1	0	106	0	1	1	1
Anglo-saxon	NEM18 (CS13)	81	9	13	1	0	53	0	1	1	1
Anglo-saxon	NEM093 (CS14)	52	7	3	1	0	39	0	0
Anglo-saxon	NEM099 (CS15)	160	9	11	0	1	129	0	0
Anglo-saxon	NBS410 (CS16)	48	9	3	0	0	35	0	0
Anglo-saxon	NBS262 (CS17)	163	9	15	0	2	119	0	0
Anglo-saxon	NBS325 (CS18)	39	7	2	0	0	26	0	0
Medieval	TKAC (CS19)	115	10	13	0	0	88	0	0
Medieval	TKDC (CS20)	146	8	20	0	0	108	0	0
Medieval	TKEC (CS21)	145	11	13	0	0	108	0	0
Medieval	TKFC (CS22)	82	8	13	0	0	55	0	0
Medieval	WG1252	272	9	21	0	1	178	5	0
Medieval	WG1082	331	10	20	1	0	245	0	1	1	1
Medieval	WG1566	221	8	23	0	1	155	10	0
Medieval	WG1483	202	8	28	0	1	128	7	0
Medieval	WG1561	221	11	19	1	1	135	4	1	1	1
Medieval	WG1585	184	5	14	1	1	132	0	1	1	1
Post-medieval	RLH 103	247	6	26	0	0	146	3	0
Post-medieval	RLH 131	83	5	6	0	0	54	0	0
Post-medieval	RLH 135	72	4	9	0	1	57	0	0
Post-medieval	RLH 208	163	5	8	0	0	122	13	0
Post-medieval	RLH 340	61	7	7	0	0	43	0	0
Post-medieval	RLH 349	82	4	5	0	0	54	0	1							1
Post-medieval	RLH 365	335	8	11	0	1	256	0	0
Post-medieval	RLH 367	72	4	9	0	0	56	0	0
Post-medieval	RLH 386	167	7	18	0	0	115	0	0
Post-medieval	RLH 397	152	7	6	0	0	116	0	0
Post-medieval	RLH 421	97	9	9	0	0	62	0	0
Post-medieval	RLH 572	141	4	6	0	0	104	0	0
Post-medieval	FW435 (CS23)	19	1	2	0	0	16	0	0
Post-medieval	FW53 (CS24)	225	8	16	1	1	175	0	2	1	1			1
Post-medieval	FW9	4	4	0	0	0	0	0	0
Post-medieval	FW68	339	10	29	1	0	215	4	1	1	1
Post-medieval	FW88	385	9	25	0	0	264	0	0
Post-medieval	FW98	673	9	49	1	0	417	3	1	1	1
Post-medieval	FW192	325	12	39	0	0	209	0	0
Post-medieval	FW217	250	10	18	0	0	178	0	0
Post-medieval	FW268	575	8	15	1	0	368	3	1	1	1
Post-medieval	FW303	295	11	34	0	0	195	0	0
Post-medieval	FW331	246	10	18	0	0	173	0	0
Post-medieval	FW450	487	8	40	1	2	301	6	3	1	1			2
Post-medieval	FAO1	445	9	15	1	1	298	0	0
Post-medieval	FAO2	549	10	23	0	0	355	19	0
Post-medieval	FAO3	547	9	22	0	1	363	7	0
Post-medieval	FAO4	184	8	13	1	0	133	0	1	1	1
Post-medieval	FAO5	554	8	19	0	0	405	0	1							1
Post-medieval	FAO6	364	11	24	0	0	233	11	0
Post-medieval	FAO7	672	9	30	0	1	465	0	0
Post-medieval	FAO8	574	9	21	0	1	376	6	0
Post-medieval	FAO9	308	8	28	0	1	208	0	0
Post-medieval	FAO10	700	8	15	0	2	458	57	0
Post-medieval	FAO11	818	13	32	1	0	549	7	0
Post-medieval	FAO12	437	11	15	0	1	303	11	0
Post-medieval	FAO13	497	12	15	0	1	357	4	0
Post-medieval	FAO14	772	10	29	2	2	491	12	2				1			1
Post-medieval	FAO15	449	8	15	0	1	315	24	0
Post-medieval	FAO16	453	10	16	0	1	296	34	0
Post-medieval	FAO17	446	8	17	1	0	307	0	0
Post-medieval	FAO18	608	11	16	1	1	428	16	1	1		1
Post-medieval	CS6	465	9	46	0	1	295	24	0
Post-medieval	CS7	594	6	18	0	1	403	0	0
Post-medieval	CS11	162	5	12	0	0	126	0	0
Post-medieval	CS12	571	9	15	0	1	367	0	0
Post-medieval	CS18	1123	7	11	0	0	833	10	0
Post-medieval	CS19	735	7	27	0	0	518	12	0
Post-medieval	CS21	205	6	20	0	0	152	0	0
Post-medieval	CS31	421	7	19	0	0	279	16	0
Post-medieval	CS40	414	9	25	0	0	292	0	0
Post-medieval	CS46	487	8	26	0	0	314	16	0
Post-medieval	SP2182	540	14	21	0	3	348	23	2					1		1
Post-medieval	SP2295	562	16	30	0	0	343	0	1							1
Post-medieval	SP2300	550	13	45	0	0	343	2	0
Post-medieval	SP2301	198	9	13	0	0	135	28	0
Post-medieval	SP2369	322	9	10	0	2	229	0	0
Post-medieval	SP2468	141	10	19	1	1	82	4	0
Post-medieval	SP2477	543	13	25	0	1	362	14	0
Post-medieval	SP2484	229	15	18	0	0	140	18	0
Post-medieval	SP2647	322	15	18	1	0	211	9	1
Post-medieval	SP2748	537	12	20	0	3	348	2	1							1
Post-medieval	SP2860	551	13	28	0	1	354	21	0
Post-medieval	STB21	449	8	16	0	1	316	0	1						1
Modern	UT103-10D	369	16	66	0	1	220	0	0
Modern	UT111-07	721	11	46	1	0	456	14	1	1	1
Modern	UT116-10D	477	10	38	1	0	313	8	1	1	1
Modern	UT73-08D	890	12	49	0	1	560	7	0
Modern	Z81	134	8	22	0	0	79	5	0
Modern	Z82	195	10	36	0	0	106	10	0
Modern	Z83	279	13	48	0	0	186	0	0
Modern	Z84 (FASP)	159	8	62	0	0	66	5	0
Modern	Z94 (GASP)	1159	11	121	3	0	662	0	3	2	1	1				1
Modern	Z85	309	8	43	0	0	206	10	0
Modern	Z86	356	6	28	0	0	268	14	0
Modern	Z87	81	6	15	0	0	53	0	0
Modern	Z88	328	7	54	0	0	204	25	0
Modern	Z89	172	9	22	0	0	118	4	0
Modern	Z90 (FASP)	112	11	22	0	0	71	0	0
Modern	Z100 (GASP)	786	11	72	1	18	447	0	23	1		1			1	21
Blank Extraction	Fewston Blank (FWNeg)	15						0	0
Blank Extraction	Blank of York modern samples (UTNeg)	5						0	0
Blank Extraction	C2d2 Neg (29)	30						0	0
Blank Extraction	C2D2 Neg (30)	11						0	0
Blank Extraction	OX_Neg	20						0	0
Blank Extraction	WG_Neg	7						0	0
Blank Extraction	RLHBK	11						0	0
Blank Extraction	FAOBK	39						0	0
Blank Extraction	CSPN2 (Negative extraction control)	13						0	0
Blank Extraction	Spitalfields (SP Neg)	3						0	0
									59	23	20	3	1	4	2	28

## Sheet: Iron Age
Individual	Protein	Species	Peptide	Score	BLAST results
ML1489	No dietary proteins
ML1823	Beta-lactoglobulin	Bovidae	-.IIVTQTMK.G + Oxidation (M)	38	Bovidae
			-.IIVTQTMK.G + Oxidation (M)	31	Bovidae
			-.IIVTQTMK.G + Oxidation (M)	36	Bovidae
			-.IIVTQTMK.G + Oxidation (M)	39	Bovidae
			-.IIVTQTMK.G + Oxidation (M)	47	Bovidae
			-.IIVTQTMK.G + Oxidation (M)	33	Bovidae
			-.IIVTQTMK.G + Oxidation (M)	37	Bovidae
			-.IIVTQTMK.G + Oxidation (M)	38	Bovidae
			-.IIVTQTMK.G + Deamidated (NQ); Oxidation (M)	26	Bovidae
			-.IIVTQTMK.G + Deamidated (NQ); Oxidation (M)	29	Bovidae
			-.IIVTQTMK.G + Deamidated (NQ); Oxidation (M)	40	Bovidae
			-.IIVTQTMK.G + Deamidated (NQ); Oxidation (M)	40	Bovidae
			-.IIVTQTMK.G + Deamidated (NQ); Oxidation (M)	42	Bovidae
			-.IIVTQTMK.G + Deamidated (NQ); Oxidation (M)	40	Bovidae
			-.IIVTQTMK.G + Deamidated (NQ); Oxidation (M)	38	Bovidae
			-.IIVTQTMK.G + Deamidated (NQ); Oxidation (M)		Bovidae
			-.IIVTQTMK.G + Oxidation (M)	47	Bovidae
			-.IIVTQTMK.G + Deamidated (NQ); Oxidation (M)	40	Bovidae
			K.IDALNENK.V	27	non-specific
			K.IDALNENK.V + Deamidated (NQ)	29	non-specific
ML3890	No dietary proteins
ML1032	Beta-lactoglobulin	Bovinae	-.IIVTQTMK.G + Oxidation (M)	34	Bovinae
			-.IIVTQTMK.G + Oxidation (M)	31	Bovinae
			K.TKIPAVFK.I	27	Bovidae
			K.VLVLDTDYK.K	28	Bovidae
			K.VLVLDTDYKK.Y	31	Bovidae
			K.VLVLDTDYKK.Y	38	Bovidae
			K.VLVLDTDYKK.Y	56	Bovidae
			K.ALPMHIR.L	31	Conserved - not BLG specific

## Sheet: Roman Period
Individual	Protein	Species	Peptide	Score	BLAST results
OX01	Beta-lactoglobulin	Bovinae	-.IIVTQTMK.G + Oxidation (M)	35	Bovinae
			K.VLVLDTDYK.K	30	Non-specific
OX03	No dietary proteins
OX04	Beta-lactoglobulin	Bovinae	R.VYVEELKPTPEGDLEILLQK.W	35	Bovinae
			K.IDALNENK.V	46	Nonspecific-Conserved
			K.VLVLDTDYK.K	70	Bovidae
			K.VLVLDTDYK.K	39	Bovidae
			K.VLVLDTDYKK.Y	36	Bovidae
			K.VLVLDTDYKK.Y	34	Bovidae
			R.LSFNPTQLEEQCHI.-	45	Specific to Bos taurus and Bubalis bubalis
OX05	No dietary proteins
OX06	No dietary proteins
OX09	No dietary proteins
OX10	No dietary proteins
OX12	Beta-lactoglobulin	Bovidae	-.IIVTQTMK.G + Oxidation (M)	34	Bovidae
			-.IIVTQTMK.G + Deamidated (NQ); Oxidation (M)	46	Bovidae
			R.VYVEELKPTPEGNLEILLQK.W	25	Bovidae
			R.VYVEELKPTPEGNLEILLQK.W + 2 Deamidated (NQ)	32	Bovidae
			K.IDALNENK.V	35	Bovidae
			K.IDALNENK.V + Deamidated (NQ)	29	Bovidae
			K.VLVLDTDYKK.Y	52	Bovidae
			K.VLVLDTDYKK.Y	26	Bovidae
			K.VLVLDTDYK.K	52	Bovidae
			K.ALPMHIR.L + Oxidation (M)	33	non-specific
3DT26 (CS5)	No dietary proteins
3DT21 (CS6)	Beta-lactoglobulin	Bovidae	-.IIVTQTMK.G + Oxidation (M)	29	Bovidae
			K.IDALNENK.V + Deamidated (NQ)	36	Bovidae
			K.IDALNENK.V + Deamidated (NQ)	27	Bovidae
			K.IDALNENK.V + Deamidated (NQ)	38	Bovidae
			K.IDALNENK.V + Deamidated (NQ)	50	Bovidae
			K.IDALNENK.V + Deamidated (NQ)	40	Bovidae
			R.TPEVDNEALEK.F + Deamidated (NQ)	51	Bovinae*
			R.TPEVDNEALEK.F + Deamidated (NQ)	51	Bovinae*
			R.TPEVDNEALEK.F + Deamidated (NQ)	48	Bovinae*
			R.TPEVDNEALEK.F + Deamidated (NQ)	44	Bovinae*
			R.TPEVDNEALEK.F + Deamidated (NQ)	44	Bovinae*
			R.TPEVDNEALEK.F + Deamidated (NQ)	42	Bovinae*
			R.TPEVDNEALEK.F + Deamidated (NQ)	41	Bovinae*
			R.TPEVDNEALEK.F + Deamidated (NQ)	29	Bovinae*
			R.TPEVDNEALEK.F + Deamidated (NQ)	31	Bovinae*
			R.TPEVDNEALEK.F + Deamidated (NQ)	32	Bovinae*
6DT3 (CS7)	No dietary proteins
6DT7(CS8)	No dietary proteins
6DT21 (CS9)	No dietary proteins
HE1987 (CS10)	No dietary proteins
HE2000 (CS11)	No dietary proteins
			*Cannot distinguished between D and deamidated N, thus Bovidae

## Sheet: Anglo-SaxonViking
Individual	Protein	Species	Peptide	Score	BLAST results
JV15548	Beta-lactoglobuli	Bovidae	-.IIVTQTMK.G + Oxidation (M)	28	Bovidae
			-.IIVTQTMK.G + Oxidation (M)	27	Bovidae
			-.IIVTQTMK.G + Oxidation (M)	38	Bovidae
			K.ALPMHIR.L	25	Conserved - not BLG specific
NEM18	Beta-lactoglobulin	Bovidae	-.IIVTQTMK.G + Oxidation (M)	36	Bovidae
			K.TKIPAVFK.I	32	Bovidae
			K.TKIPAVFK.I	30	Bovidae
			K.IDALNENK.V + Deamidated (NQ)	44	Nonspecific-Conserved
			K.IDALNENK.V + Deamidated (NQ)	28	Nonspecific-Conserved
			K.IDALNENK.V + Deamidated (NQ)	31	Nonspecific-Conserved
			K.VLVLDTDYK.K	53	Bovidae
			K.VLVLDTDYK.K	59	Bovidae
			K.VLVLDTDYK.K	32	Bovidae
			K.VLVLDTDYKK.Y	31	Bovidae
			K.VLVLDTDYKK.Y	30	Bovidae
			K.ALPMHIR.L	29	Nonspecific-Conserved
			K.ALPMHIR.L	33	Nonspecific-Conserved
			K.ALPMHIR.L	31	Nonspecific-Conserved
			K.ALPMHIR.L	31	Nonspecific-Conserved
			K.ALPMHIR.L	31	Nonspecific-Conserved
			K.ALPMHIR.L + Oxidation (M)	26	Nonspecific-Conserved
			K.ALPMHIR.L + Oxidation (M)	26	Nonspecific-Conserved
			K.ALPMHIR.L + Oxidation (M)	31	Nonspecific-Conserved
			K.ALPMHIR.L + Oxidation (M)	25	Nonspecific-Conserved
NEM093	No dietary proteins
NEM099	No dietary proteins
NBS410	No dietary proteins
NBS262	No dietary proteins
NBS325	No dietary proteins

## Sheet: Medieval Period
Individual	Protein	Species	Peptide	Score	BLAST results
TKAC	No dietary proteins
TKDC	No dietary proteins
TKEC	No dietary proteins
TKFC	No dietary proteins
WG1252	No dietary proteins
WG1082	Beta-lactoglobulin	Bovidae	R.TPEVDDEALEK.F	58	Bovinae*
			R.TPEVDDEALEK.F	77	Bovinae*
			R.TPEVDDEALEK.F	47	Bovinae*
			R.TPEVDDEALEK.F	63	Bovinae*
			R.TPEVDDEALEKFDK.A	34	Bovinae*
WG1566	No dietary proteins
WG1483	No dietary proteins
WG1561	Beta-lactoglobulin	Bovidae	K.TKIPAVFK.I	32	non-specific
			K.IDALNENK.V + Deamidated (NQ)	48	non-specific
			R.TPEVDDEALEK.F	68	Bovinae*
			R.TPEVDDEALEK.F	40	Bovinae*
			R.TPEVDDEALEK.F	47	Bovinae*
WG1585	Beta-lactoglobulin	Bovidae	R.TPEVDDEALEK.F	27	Bovinae*
			R.TPEVDDEALEKFDK.A	33	Bovinae*
*Cannot distinguished between D and deamidated N, thus Bovidae

## Sheet: Postmedieval
Individual	Protein	Species	Peptide	Score	BLAST results
CS40	No dietary proteins
CS6	No dietary proteins
CS7	No dietary proteins
CS11	No dietary proteins
CS12	No dietary proteins
CS18	No dietary proteins
CS19	No dietary proteins
CS21	No dietary proteins
CS31	No dietary proteins
CS46	No dietary proteins
FW435 (CS23)	None
FW53 (CS24)	12S seed storage globulin 1	Avena	R.LQAFEPLR.Q	30	Highly conserved
			R.ALPVDVLANAYR.I	38	Unique to Avena
			R.ALPVDVLANAYR.I	35	Unique to Avena
	Beta-lactoglobulin	Pecora	K.VLVLDTDYKK.Y	33	Pecora
			K.VLVLDTDYKK.Y	61	Pecora
			K.ALPMHIR.L	31	Non-specific
			K.ALPMHIR.L + Oxidation (M)	37	Non-specific
FW9	No dietary proteins
FW68	Beta-lactoglobulin	Bovinae	K.VLVLDTDYKK.Y	32	BLG- Pecora
			K.VLVLDTDYKK.Y	39	BLG- Pecora
			R.TPEVDDEALEK.F	63	Bovinae*
			R.TPEVDDEALEK.F + Propionamide (K)	44	Bovinae*
			R.TPEVDDEALEKFDK.A	80	Bovinae*
			R.LSFNPTQLEEQCHI.-	72	Bovinae
			R.LSFNPTQLEEQCHI.- + Deamidated (NQ)	60	Bovinae
			R.LSFNPTQLEEQCHI.- + Deamidated (NQ)	27	Bovinae
			R.LSFNPTQLEEQCHI.- + 2 Deamidated (NQ)	62	Bovinae
			R.VYVEELKPTPEGDLEILLQK.W	44	Bovinae
FW88	No dietary proteins
FW98	Beta-lactoglobulin	Bovinae	K.VLVLDTDYKK.Y	31	Pecora
			R.TPEVDDEALEK.F	51	Bovinae*
			R.TPEVDDEALEKFDK.A	60	Bovinae*
			R.LSFNPTQLEEQCHI.-	70	Bovinae
FW192	No dietary proteins
FW217	No dietary proteins
FW268	Beta-lactoglobulin	Bovinae	R.TPEVDDEALEKFDK.A	41	Bovinae*
			R.LSFNPTQLEEQCHI.-	73	Bovinae
FW303	No dietary proteins
FW331	No dietary proteins
FW450	Beta-lactoglobulin	Bovinae	K.ALPMHIR.L + Oxidation (M)	39	Non-specific/non-blg
			K.TKIPAVFK.I	40	Non-specific/non-blg
			K.VLVLDTDYKK.Y	55	Pecora
			K.VLVLDTDYKK.Y	49	Pecora
			R.TPEVDDEALEK.F	43	Bovinae*
			R.TPEVDDEALEK.F + Propionamide (K)	66	Bovinae*
			R.TPEVDDEALEKFDK.A	67	Bovinae*
			R.TPEVDDEALEKFDK.A	45	Bovinae*
			R.TPEVDDEALEKFDK.A + Propionamide (K)	55	Bovinae*
			R.TPEVDDEALEKFDK.A + Propionamide (K)	31	Bovinae*
			R.LSFNPTQLEEQCHI.-	76	Bovinae
			R.LSFNPTQLEEQCHI.- + Deamidated (NQ)	71	Bovinae
			R.LSFNPTQLEEQCHI.- + Deamidated (NQ)	55	Bovinae
			R.LSFNPTQLEEQCHI.- + 2 Deamidated (NQ)	66	Bovinae
			R.LSFNPTQLEEQCHI.- + 2 Deamidated (NQ)	54	Bovinae
			R.VYVEELKPTPEGDLEILLQK.W	29	Bovinae
			K.VAGTWYSLAMAASDISLLDAQSAPLR.V	45	Bovidae
			K.YLLFCMENSAEPEQSLACQCLVR.T + Deamidated (NQ)	42	Bovidae
			K.YLLFCMENSAEPEQSLACQCLVR.T + Oxidation (M)	51	Bovidae
			K.YLLFCMENSAEPEQSLACQCLVR.T + Deamidated (NQ); Oxidation (M)	81	Bovidae
	12S seed storage globulin 1	Avena sativa	R.LQAFEPLR.Q + Deamidated (NQ)	32	BOP clade
			R.EGCQYISFK.T	39	BOP clade
			R.ALPVDVLANAYR.I	53	Avena sativa
	Serpin-ZXB	Oryza	R.LVLGNALYFK.G	38	Poaceae
			K.ISFGFEASDLLK.I	41	Oryza
SP2182	Glyceraldehyde-3-phosphate dehydrogenase, cytosolic OS=Pisum sativum	Pisum sativum	K.IGINGFGR.I	41	Not unique
			K.IGINGFGR.I + Deamidated (NQ)	54	Not unique
			K.VIISAPSKDAPMFVVGVNENEYKPEFDIISNASCTTNCLAPLAK.V + 2 Deamidated (NQ); Propionamide (K)	30	Pisum sativum
	Glyceraldehyde-3-phosphate dehydrogenase 2, cytosolic	Poales	K.IGINGFGR.I	41	Not unique
			K.IGINGFGR.I + Deamidated (NQ)	54	Not unique
			K.DAPMFVVGVNEKEYKPDIDIVSNASCTTNCLAPLAK.V + 3 Deamidated (NQ); 2 Propionamide (K)	28	Poales
SP2295	Pyruvate, phosphate dikinase 1, chloroplastic OS=Arabidopsis thaliana	Rosid	R.GGMTSHAAVVAR.G	62	Not unique
			R.GGMTSHAAVVAR.G + Oxidation (M)	73	Not unique
			R.KNGAQGIGLCR.T + Deamidated (NQ)	45	Rosids
SP2300	No dietary proteins
SP2301	No dietary proteins
SP2369	No dietary proteins	Brassicaceae	R.IDEQSNFEK.L + Propionamide (K)	51	Brassicaceae
SP2468	No dietary proteins		K.RIDEQSNFEK.L + Propionamide (K)	44	Brassicaceae
SP2477	No dietary proteins
SP2484	No dietary proteins
SP2647	Beta-lactoglobulin	Bovinae	K.ALPMHIR.L + Oxidation (M)	30	Not unique
			R.LSFNPTQLEEQCHI.- + Deamidated (NQ)	79	Bovinae
			R.LSFNPTQLEEQCHI.-	74	Bovinae
SP2748	Elongation factor Tu, chloroplastic	Magnoliophyta	K.ILDEAMAGDNVGLLLR.G + Deamidated (NQ); Oxidation (M)	66	Magnoliophyta
			R.HYAHVDCPGHADYVK.N	57	Not unique
			R.HYAHVDCPGHADYVK.N	49	Not unique
SP2860	No dietary proteins
STB21	Allergen Bra j 1-E	Brassiceae	R.VSICPFQK.T	37	Brassiceae
			R.IYQTATHLPR.V	59	Brassiceae
RLH 103	No dietary proteins
RLH 131	No dietary proteins
RLH 135	No dietary proteins
RLH 208	No dietary proteins
RLH 340	No dietary proteins
RLH 349	Glyceraldehyde-3-phosphate dehydrogenase A, chloroplastic	Papilionoideae	K.QLKVAINGFGR.I + Deamidated (NQ)	45	Papilionoideae (fabid)
			K.QLKVAINGFGR.I + Deamidated (NQ)	28	Papilionoideae (fabid)
			K.QLKVAINGFGR.I + Deamidated (NQ)	40	Papilionoideae (fabid)
			K.QLKVAINGFGR.I + Deamidated (NQ)	53	Papilionoideae (fabid)
			K.QLKVAINGFGR.I + Deamidated (NQ)	55	Papilionoideae (fabid)
			K.VAINGFGR.I + Deamidated (NQ)	31	Non-specific/conserved
			K.VAINGFGR.I + Deamidated (NQ)	48	Non-specific/conserved
			K.VAINGFGR.I + Deamidated (NQ)	26	Non-specific/conserved
			K.VAINGFGR.I + Deamidated (NQ)	50	Non-specific/conserved
			K.VAINGFGR.I + Deamidated (NQ)	42	Non-specific/conserved
			R.ARAAALNIVPTSTGAAK.A	65	Non-specific/conserved
			R.ARAAALNIVPTSTGAAK.A	57	Non-specific/conserved
			R.AAALNIVPTSTGAAK.A	43	Non-specific/conserved
			R.AAALNIVPTSTGAAK.A	25	Non-specific/conserved
			R.AAALNIVPTSTGAAK.A + Deamidated (NQ)	58	Non-specific/conserved
			R.AAALNIVPTSTGAAK.A + Deamidated (NQ)	57	Non-specific/conserved
RLH 365	No dietary proteins
RLH 367	No dietary proteins
RLH 386	No dietary proteins
RLH 397	No dietary proteins
RLH 421	No dietary proteins
RLH 572	No dietary proteins
FAO1	No dietary proteins
FAO2	No dietary proteins
FAO3	No dietary proteins
FAO4	Beta-lactoglobulin	Bovinae	K.VLVLDTDYKK.Y	34	Bovidae
			R.TPEVDDEALEKFDK.A	66	Bovinae*
			R.TPEVDDEALEKFDK.A	77	Bovinae*
			R.TPEVDDEALEKFDK.A + Propionamide (K)	80	Bovinae*
			K.ALPMHIR.L + Oxidation (M)	40	non-specific
			R.LSFNPTQLEEQCHI.-	60	Specific to Bos taurus and Bubalis bubalis
			R.LSFNPTQLEEQCHI.- + Deamidated (NQ)	35	Specific to Bos taurus and Bubalis bubalis
			R.LSFNPTQLEEQCHI.- + 2 Deamidated (NQ)	61	Specific to Bos taurus and Bubalis bubalis
FAO5	No dietary proteins
FAO6	Glyceraldehyde-3-phosphate dehydrogenase A, chloroplastic	Papilionoideae	K.QLKVAINGFGR.I + Deamidated (NQ)	56	Papilionoideae (fabid)
			K.QLKVAINGFGR.I + Propionamide (K)	27	Papilionoideae (fabid)
			K.QLKVAINGFGR.I + Propionamide (N-term)	56	Papilionoideae (fabid)
			K.QLKVAINGFGR.I + Deamidated (NQ); Propionamide (N-term)	47	Papilionoideae (fabid)
			K.QLKVAINGFGR.I + Deamidated (NQ); Propionamide (K)	38	Papilionoideae (fabid)
			K.QLKVAINGFGR.I + Deamidated (NQ); Propionamide (N-term)	33	Papilionoideae (fabid)
			K.QLKVAINGFGR.I + Deamidated (NQ); Propionamide (K)	30	Papilionoideae (fabid)
			K.VAINGFGR.I	64	Non-specific/conserved
			K.VAINGFGR.I + Deamidated (NQ)	2	Non-specific/conserved
			K.VAINGFGR.I + Deamidated (NQ)	50	Non-specific/conserved
			K.VAINGFGR.I + Deamidated (NQ)	35	Non-specific/conserved
			K.VAINGFGR.I + Deamidated (NQ)	29	Non-specific/conserved
			K.VAINGFGR.I + Deamidated (NQ)	36	Non-specific/conserved
			K.VAINGFGR.I + Deamidated (NQ)	48	Non-specific/conserved
			R.AAALNIVPTSTGAAK.A	60	Non-specific/conserved
FAO7	No dietary proteins
FAO8	No dietary proteins
FAO9	No dietary proteins
FAO10	No dietary proteins
FAO11	No dietary proteins
FAO12	No dietary proteins
FAO13	No dietary proteins
FAO14	Glyceraldehyde-3-phosphate dehydrogenase A, chloroplastic	Papilionoideae	K.QLKVAINGFGR.I	51	Papilionoideae (fabid)
			K.QLKVAINGFGR.I + Deamidated (NQ)	49	Papilionoideae (fabid)
			K.QLKVAINGFGR.I + Deamidated (NQ)	37	Papilionoideae (fabid)
			K.QLKVAINGFGR.I + Deamidated (NQ); Propionamide (K)	28	Papilionoideae (fabid)
			K.QLKVAINGFGR.I + Deamidated (NQ); Propionamide (N-term)	37	Papilionoideae (fabid)
			K.VAINGFGR.I	50	Non-specific/conserved
			K.VAINGFGR.I + Deamidated (NQ)	37	Non-specific/conserved
			K.VAINGFGR.I + Deamidated (NQ)	39	Non-specific/conserved
			K.VAINGFGR.I + Deamidated (NQ)	51	Non-specific/conserved
			K.VAINGFGR.I + Deamidated (NQ)	42	Non-specific/conserved
			R.AAALNIVPTSTGAAK.A	31	Non-specific/conserved
	Hemoglobin subunit beta	Pecora	K.VKVDEVGAEALGR.L	27	Pecora
			R.LLVVYPWTQR.F	59	Non-specific
FAO15	No dietary proteins
FAO16	No dietary proteins
FAO17	No dietary proteins
FAO18	Alpha-S1-casein	Caprinae	R.FVVAPFPEVFR.K	37	Caprinae (and Pantholops)
			R.YLGYLEQLLR.L	52	Bovidae
*Cannot distinguished between D and deamidated N, thus Bovidae

## Sheet: Modern Samples
Individual	Protein	Species	Peptide	Score	BLAST results
UT103-10D	No Dietary Proteins
UT111-07	Beta-lactoglobulin	Bovidae	K.IDALNENK.V	33	Not unique
			K.VLVLDTDYK.K	45	BLG- Pecora
			R.TPEVDDEALEK.F	69	Bovinae*
			R.TPEVDDEALEKFDK.A	39	Bovinae*
			R.TPEVDDEALEKFDK.A	84	Bovinae*
UT116-10D	Beta-lactoglobulin	Bovidae	K.IDALNENK.V	41	Not unique
			K.VLVLDTDYK.K	48	BLG- Pecora
			K.VLVLDTDYKK.Y	46	BLG- Pecora
			R.TPEVDDEALEK.F	55	Bovinae*
			R.TPEVDDEALEKFDK.A	66	Bovinae*
			R.TPEVDDEALEKFDK.A	83	Bovinae*
			R.VYVEELKPTPEGDLEILLQK.W	33	Bovidae
UT73-08D	No Dietary Proteins
Z81	No Dietary Proteins
Z82	No Dietary Proteins
Z83	No Dietary Proteins
Z84	No Dietary Proteins
Z94	Alpha-S1-casein	Bos taurus	R.YLGYLEQLLR.L	47	Bovidae
			K.HIQKEDVPSER.Y	29	Bovinae
			R.FFVAPFPEVFGK.E	40	Bos taurus
	Beta-lactoglobulin	Bovinae	R.TPEVDDEALEKFDK.A	71	Bovinae*
			R.LSFNPTQLEEQCHI.-	46	Bovinae
			K.VAGTWYSLAMAASDISLLDAQSAPLR.V	63	Pecora
	Actin-65	Solanum tuberosum	-.AGFAGDDAPR.A	91	Not unique
			R.AVFPSIVGRPR.H	43	Not unique
			K.IWHHTFYNELR.V	63	Not unique
			K.IWHHTFYNELR.V	47	Not unique
			R.TTGIVMGSGDGVSHTVPIYEGYALPHAILR.L + Propionamide (N-term)	40	Solanum tuberosum
			R.TTGIVMGSGDGVSHTVPIYEGYALPHAILR.L + Propionamide (N-term)	60	Solanum tuberosum
			R.TTGIVMGSGDGVSHTVPIYEGYALPHAILR.L + Propionamide (N-term)	57	Solanum tuberosum
			R.TTGIVMGSGDGVSHTVPIYEGYALPHAILR.L + Oxidation (M); Propionamide (N-term)	65	Solanum tuberosum
			R.GYSFTTTAER.E	48	Not unique
Z85	No Dietary Proteins
Z86	No Dietary Proteins
Z87	No Dietary Proteins
Z88	No Dietary Proteins
Z89	No Dietary Proteins
Z90	No Dietary Proteins
Z100	Fructose-bisphosphate aldolase, cytoplasmic isozyme	Mesangiospermae	K.VAPEVVAEHTVR.A	40	Mesangiospermae
			K.GILAADESTGTIGKR.L	48	Not unique
	Elongation factor 1-alpha	Spermatophyta	R.QTVAVGVIK.G	56	Not unique
			R.LPLQDVYK.I	35	Not unique
			R.VETGVIKPGMVVTFGPTGLTTEVK.S	43	Spermatophyta
			R.VETGVIKPGMVVTFGPTGLTTEVK.S	48	Spermatophyta
	Alpha-S1-casein	Bos taurus	R.YLGYLEQLLR.L	50	Bovidae
			R.FFVAPFPEVFGK.E	51	Bos taurus
	Peroxygenase 2	Arabidopsis thaliana	R.CFDGSLFEYCAK.N	57	Mesangiospermae
			R.TIPDKLSLGELWDMTEGNR.D	32	Arabidopsis thaliana
	Glyceraldehyde-3-phosphate dehydrogenase GAPA2, chloroplastic	Rosids	K.VAINGFGR.I	39	Not unique
			K.VAINGFGR.I + Deamidated (NQ)	26	Not unique
			K.AVALVLPNLK.G + Deamidated (NQ)	53	Not unique
			R.AAALNIVPTSTGAAK.A	44	Rosids
	UTP--glucose-1-phosphate uridylyltransferase	Mesangiospermae	K.NGFINLVSR.Y	38	Mesangiospermae
			K.NGFINLVSR.Y + Deamidated (NQ)	75	Mesangiospermae
			K.VLQLETAAGAAIR.F	67	Streptophyta
			K.LNGGLGTTMGCTGPK.S	46	Not unique
	UTP--glucose-1-phosphate uridylyltransferase	Streptophyta	K.AIGINVPR.S	34	Not unique
			K.VLQLETAAGAAIR.F	67	Streptophyta
			K.LNGGLGTTMGCTGPK.S	46	Not unique
			R.YLSGEAQHVEWSK.I	61	eudicotyledons
	Elongation factor 2	Magnoliophyta	K.FSVSPVVR.V	39	Not unique
			K.STLTDSLVAAAGIIAQEVAGDVR.M	86	Magnoliophyta
			K.STLTDSLVAAAGIIAQEVAGDVR.M	64	Magnoliophyta
	ATP synthase subunit beta, mitochondrial	Mesangiospermae	K.IGLFGGAGVGK.T	52	Not unique
			R.VLNTGSPITVPVGR.A	79	Mesangiospermae
			R.IPSAVGYQPTLATDLGGLQER.I	56	Not unique
	Glycinin G2	Glycine max/soja	R.FREGDLIAVPTGVAWWMYNNEDTPVVAVSIIDTNSLENQLDQMPR.R + Deamidated (NQ); Oxidation (M); Propionamide (N-term)	32	Glycine max/soja
			R.FREGDLIAVPTGVAWWMYNNEDTPVVAVSIIDTNSLENQLDQMPR.R + Deamidated (NQ); Oxidation (M); Propionamide (N-term)	35	Glycine max/soja
			R.FREGDLIAVPTGVAWWMYNNEDTPVVAVSIIDTNSLENQLDQMPR.R + 3 Deamidated (NQ); Oxidation (M); Propionamide (N-term)	30	Glycine max/soja
			R.FREGDLIAVPTGVAWWMYNNEDTPVVAVSIIDTNSLENQLDQMPR.R + 3 Deamidated (NQ); Oxidation (M); Propionamide (N-term)	31	Glycine max/soja
			R.FREGDLIAVPTGVAWWMYNNEDTPVVAVSIIDTNSLENQLDQMPR.R + 3 Deamidated (NQ); 2 Oxidation (M); Propionamide (N-term)	29	Glycine max/soja
	rachin Ahy-3	Arachis ipaensis	K.GGLSILVPPEWR.Q	57	Arachis
			R.TVNELDLPILNR.L	46	Arachis
			K.STSADIYNPQAGSVR.T	91	Arachis
			R.HFQGQDQSQRPLDTHQK.V	27	Arachis
			K.NNNPFTFLVPPQDSQMIR.T + Deamidated (NQ)	37	Arachis
			R.LNAQRPDNCIESEGGYIETWNPNNQEFQCAGVALSR.F	30	Arachis ipaensis
	Linoleate 9S-lipoxygenase (Fragment) OS=Phaseolus vulgaris	Papilionoideae	K.SAWMTDEEFAR.E	50	Pentapetalae
			K.ETLIDLTVIEILSR.H	37	Papilionoideae
			K.LFILDHHDYLIPYLR.R	66	Papilionoideae
			K.MPYTLLYPSSEEGLTFR.G	32	Papilionoideae
			K.MPYTLLYPSSEEGLTFR.G	49	Papilionoideae
	Seed linoleate 9S-lipoxygenase-3 OS=Glycine max	Papilionoideae	K.SSDFLTYGLK.S	50	Papilionoideae
			K.SAWMTDEEFAR.E	37	Pentapetalae
	Ribulose bisphosphate carboxylase large chain (Fragment)	Spermatophyta	R.IPISYIK.T	25	Not unique
			R.AVYECLR.G	34	Not unique
			K.DTDILAAFR.V	49	Not unique
			R.DNGLLLHIHR.A	48	Viridiplantae
			R.LSGGDHIHAGTVVGK.L	68	Spermatophyta
			K.TFQGPPHGIQVER.D	77	Not unique
			K.YGRPLLGCTIKPK.L	32	Not unique
			R.GGLDFTKDDENVNSQPFMR.W	116	Not unique
	Galactose-binding lectin	Arachis	R.VLYAMPVR.I	34	Arachis
			R.VLYAMPVR.I + Oxidation (M)	35	Arachis
			K.VTVIYDSSTK.T	46	Arachis
			K.FGFSASGSLGGR.Q	75	Arachis
			K.TVPWNSVSGAVVK.V	64	Arachis
			R.SWSFTSTLITTTR.R	74	Arachis
			R.SWSFTSTLITTTRR.S	27	Arachis
			K.GAGHFVGVEFDTYSNSEYNDPPTDHVGIDVNSVDSVK.T + Deamidated (NQ)	47	Arachis
	Histone H3.2	Mesangiospermae	R.KLPFQR.L	41	Not unique
			K.STELLIR.K	67	Not unique
			K.STELLIR.K + Propionamide (N-term)	64	Not unique
			YQKSTELLIR.K + Propionamide (K)	45	Not unique
			YQKSTELLIR.K + Propionamide (K)	41	Not unique
			R.EIAQDFKTDLR.F	37	Not unique
			R.EIAQDFKTDLR.F	65	Not unique
			YQKSTELLIR.K + Propionamide (K); Propionamide (N-term)	37	Not unique
			R.VTIMPKDIQLAR.R + Oxidation (M); Propionamide (K)	25	Not unique
			R.FQSSAVAALQEAAEAYLVGLFEDTNLCAIHAK.R + Deamidated (NQ)	76	Mesangiospermae
	Histone H3.3	Euphyllophyta	R.KLPFQR.L	41	Not unique
			K.STELLIR.K	67	Not unique
			K.STELLIR.K + Propionamide (N-term)	64	Not unique
			YQKSTELLIR.K + Propionamide (K)	45	Not unique
			YQKSTELLIR.K + Propionamide (K)	41	Not unique
			R.EIAQDFKTDLR.F	37	Not unique
			R.EIAQDFKTDLR.F	65	Not unique
			YQKSTELLIR.K + Propionamide (K); Propionamide (N-term)	37	Not unique
			R.VTIMPKDIQLAR.R + Oxidation (M); Propionamide (K)	25	Not unique
			R.FQSHAVLALQEAAEAYLVGLFEDTNLCAIHAK.R + 3 Deamidated (NQ); Propionamide (N-term)	49	Euphyllophyta
	Protein SLE2	Pentapetalae	K.SLEAQQHLAEGR.S + Deamidated (NQ)	62	Pentapetalae
			K.EQLGTEGYQEMGR.K	107	Mesangiospermae
	Glyceraldehyde-3-phosphate dehydrogenase, cytosolic	Pentapetalae	R.SSIFDAK.A	55	Not unique
			K.LTGMAFR.V	50	Not unique
			IGINGFGR.I	59	Not unique
			IGINGFGR.I + Deamidated (NQ)	34	Not unique
			K.GILGYTEDDVVSTDFVGDSR.S	134	Pentapetalae
	Conglutin	Arachis	R.CDLDVSGGR.C	31	Arachis
			R.CDLDVSGGRC.-	48	Arachis
			R.ELMNLPQQCNFR.A	51	Arachis
			R.ELMNLPQQCNFR.A + Oxidation (M)	51	Arachis
			R.VNLKPCEQHIMQR.I	54	Arachis
			R.VNLKPCEQHIMQR.I	49	Arachis
			R.VNLKPCEQHIMQR.I	75	Arachis
			R.VNLKPCEQHIMQR.I + Oxidation (M)	32	Arachis
			R.VNLKPCEQHIMQR.I + Oxidation (M)	38	Arachis
			R.VNLKPCEQHIMQR.I + Oxidation (M)	38	Arachis
			R.CCDELNEMENTQR.C	76	Arachis
			R.CCDELNEMENTQR.C + Deamidated (NQ)	64	Arachis
			R.VNLKPCEQHIMQR.I + Propionamide (K)	38	Arachis
			R.CCDELNEMENTQR.C + Oxidation (M)	76	Arachis
			R.IMGEQEQYDSYDIR.S	111	Arachis
			R.IMGEQEQYDSYDIR.S + Oxidation (M)	105	Arachis
			R.CMCEALQQIMENQCDR.L	98	Arachis
			R.QVDRVNLKPCEQHIMQR.I	38	Arachis
			R.CMCEALQQIMENQCDRLQDR.Q	47	Arachis
			R.CMCEALQQIMENQCDRLQDR.Q	44	Arachis
			R.CMCEALQQIMENQCDRLQDR.Q + Oxidation (M)	31	Arachis
	Conglutin-7	Arachis	R.CQSQLER.A	36	Not unique
			R.QQEQQFKR.E	34	Arachis
			R.NLPQQCGLR.A	25	Arachis
			R.CDLEVESGGR.D	31	Arachis
			R.ANLRPCEQHLMQK.I	38	Arachis
			R.ANLRPCEQHLMQK.I	43	Arachis
			R.ANLRPCEQHLMQK.I + Oxidation (M)	27	Arachis
			R.CCNELNEFENNQR.C	28	Arachis
			R.CCNELNEFENNQR.C	74	Arachis
			R.CCNELNEFENNQR.C + Deamidated (NQ)	68	Arachis
			R.CCNELNEFENNQR.C + Deamidated (NQ)	64	Arachis
			R.CCNELNEFENNQR.C + Deamidated (NQ)	88	Arachis
			R.CMCEALQQIMENQSDR.L	86	Arachis
			R.CMCEALQQIMENQSDR.L	71	Arachis
			R.CMCEALQQIMENQSDR.L + Oxidation (M)	64	Arachis
			R.CMCEALQQIMENQSDR.L + Oxidation (M)	66	Arachis
			R.CMCEALQQIMENQSDRLQGR.Q	47	Arachis
			R.CMCEALQQIMENQSDRLQGR.Q	36	Arachis
			R.CMCEALQQIMENQSDRLQGR.Q + Deamidated (NQ)	37	Arachis
			R.CMCEALQQIMENQSDRLQGR.Q + Deamidated (NQ)	41	Arachis
			R.CMCEALQQIMENQSDRLQGR.Q + Oxidation (M)	32	Arachis
			R.CMCEALQQIMENQSDRLQGR.Q + Oxidation (M)	52	Arachis
			R.CMCEALQQIMENQSDRLQGR.Q + Oxidation (M)	29	Arachis
	Allergen Ara h 1, clone P17	Arachis hypogaea	R.WGPAEPR.E	35	Not unique
			K.AMVIVVVNK.G	54	Arachis
			LFEVKPDK.K	50	Not unique
			K.EHVQELTK.H	48	Not unique
			K.EHVeELTK.H	49	Not unique
			K.AMVIVVVNK.G + Oxidation (M)	38	Arachis
			R.SSDNEGVIVK.V	91	Arachis
			LFEVKPDKK.N	72	Arachis
			K.GTGNLELVAVR.K	102	Arachis
			R.NNPFYFPSR.R	33	Arachis
			LFEVKPDKK.N + Propionamide (K)	53	Not unique
			R.SSENNEGVIVK.V + Deamidated (NQ)	36	Arachis
			QFQNLQNHR.I	39	Arachis
			QFQNLQNHR.I	77	Arachis
			K.GTGNLELVAVRK.E	37	Arachis
			K.SFNLDEGHALR.I	52	Arachis
			K.SFNLDEGHALR.I	62	Arachis
			R.DQSSYLQGFSR.N	50	Arachis
			R.DQSSYLQGFSR.N + Deamidated (NQ)	46	Arachis
			K.VSKEHVQELTK.H	68	Arachis
			K.VSKEHVQELTK.H	96	Arachis
			K.VSKEHVeELTK.H	80	Arachis
			K.VSKEHVeELTK.H	48	Arachis
			R.EGEPDLSNNFGK.L	37	Arachis
			R.EGEPDLSNNFGK.L + Deamidated (NQ)	48	Arachis
			K.EHVQELTKHAK.S	29	Arachis
			R.DGEPDLSNNFGR.L	58	Arachis
			K.EGALMLPHFNSK.A	26	Arachis
			K.EGALMLPHFNSK.A + Deamidated (NQ)	33	Arachis
			K.EGALMLPHFNSK.A + Oxidation (M)	49	Arachis
			R.SSDNEGVIVKVSK.E	30	Arachis
			K.VSKEHVQELTK.H + Propionamide (K)	50	Arachis
			K.VSKEHVQELTK.H + Propionamide (K)	57	Arachis
			K.VSKEHVeELTK.H + Propionamide (K)	52	Arachis
			K.VSKEHVeELTK.H + Propionamide (K)	53	Arachis
			K.DLAFPGSGEQVEK.L	26	Arachis
			R.IPSGFISYILNR.H	39	Arachis
			R.IPSGFISYILNR.H	63	Arachis
			R.IPSGFISYILNR.H + Deamidated (NQ)	63	Arachis
			R.KSFNLDEGHALR.I	81	Arachis
			K.EHVQELTKHAK.S + Propionamide (K)	49	Arachis
			K.EHVeELTKHAK.S + Propionamide (K)	25	Arachis
			K.EHVeELTKHAK.S + Propionamide (K)	48	Arachis
			R.SKQFQNLQNHR.I	101	Arachis
			R.SKQFQNLQNHR.I	63	Arachis
			R.SKQFQNLQNHR.I + Deamidated (NQ)	62	Arachis
			R.SKQFQNLQNHR.I + Deamidated (NQ)	48	Arachis
			R.SRQFQNLQNHR.I	93	Arachis
			R.SRQFQNLQNHR.I	54	Arachis
			R.SRQFQNLQNHR.I + Deamidated (NQ)	37	Arachis
			R.SSDNEGVIVKVSK.E + Propionamide (K)	54	Arachis
			R.SSDNEGVIVKVSK.E + Propionamide (K)	72	Arachis
			R.KSFNLDEGHALR.I + Propionamide (K)	77	Arachis
			R.KSFNLDEGHALR.I + Propionamide (K)	74	Arachis
			R.SKQFQNLQNHR.I + Propionamide (K)	51	Arachis
			R.SKQFQNLQNHR.I + Propionamide (K)	48	Arachis
			R.SRQFQNLQNHR.I + Propionamide (N-term)	69	Arachis
			R.KSFNLDEGHALR.I + Propionamide (K); Propionamide (N-term)	50	Arachis
			R.KSFNLDEGHALR.I + Propionamide (K); Propionamide (N-term)	57	Arachis
			R.SKQFQNLQNHR.I + Propionamide (K); Propionamide (N-term)	32	Arachis
			R.SKQFQNLQNHR.I + Propionamide (K); Propionamide (N-term)	72	Arachis
			R.SKQFQNLQNHR.I + Propionamide (K); Propionamide (N-term)	56	Arachis
			R.EGEQEWGTPGSEVR.E	57	Arachis
			R.SSENNEGVIVKVSK.E + Propionamide (K)	62	Arachis
			R.EGEQEWGTPGSHVR.E	85	Arachis
			R.EGEQEWGTPGSHVR.E	53	Arachis
			R.VLLEENAGGEQEER.G	110	Arachis
			R.VLLEENAGGEQEER.G + Deamidated (NQ)	109	Arachis
			K.GSEEEDITNPINLR.D	80	Arachis
			K.GSEEEGDITNPINLR.E	81	Arachis
			K.GSEEEGDITNPINLR.E	58	Arachis
			R.IVQIEAKPNTLVLPK.H	27	Arachis
			R.IVQIEAKPNTLVLPK.H	43	Arachis
			R.IVQIEARPNTLVLPK.H	29	Arachis
			R.IVQIEARPNTLVLPK.H + Deamidated (NQ)	26	Arachis
			R.IVQIEARPNTLVLPK.H + Deamidated (NQ)	39	Arachis
			K.KGSEEEDITNPINLR.D	57	Arachis
			K.GSEEEGDITNPINLR.E + Propionamide (N-term)	78	Arachis
			R.RVLLEENAGGEQEER.G	75	Arachis
			R.RVLLEENAGGEQEER.G	83	Arachis
			R.RVLLEENAGGEQEER.G + Deamidated (NQ)	54	Arachis
			R.IVQIEAKPNTLVLPK.H + Propionamide (K)	61	Arachis
			R.IVQIEAKPNTLVLPK.H + Propionamide (N-term)	25	Arachis
			R.NTLEAAFNAEFNEIR.R	61	Arachis
			R.NTLEAAFNAEFNEIR.R	132	Arachis
			K.KGSEEEGDITNPINLR.E	154	Arachis
			K.KGSEEEGDITNPINLR.E	47	Arachis
			K.QAKDLAFPGSGEQVEK.L + Propionamide (K)	65	Arachis
			K.DLAFPGSGEQVEKLIK.N + Propionamide (K)	29	Arachis
			K.DLAFPGSGEQVEKLIK.N + Propionamide (K)	45	Arachis
			R.IFLAGDKDNVIDQIEK.Q	106	Arachis
			R.IFLAGDKDNVIDQIEK.Q	73	Arachis
			R.IFLAGDKDNVIDQIEK.Q + Deamidated (NQ)	43	Arachis
			R.IFLAGDKDNVIDQIEK.Q + Propionamide (K)	26	Arachis
			R.IFLAGDKDNVIDQIEK.Q + Propionamide (K)	59	Arachis
			R.NTLEAAFNAEFNEIRR.V	51	Arachis
			R.NTLEAAFNAEFNEIRR.V		Arachis
			R.NTLEAAFNAEFNEIRR.V + Deamidated (NQ)	42	Arachis
			R.CLQSCQQEPDDLKQK.A	40	Arachis
			R.CLQSCQQEPDDLKQK.A	84	Arachis
			R.VLLEENAGGEQEERGQR.R	36	Arachis
			R.VLLEENAGGEQEERGQR.R	39	Arachis
			K.KGSEEEGDITNPINLR.E + Propionamide (K); Propionamide (N-term)	97	Arachis
			R.VLLEENAGGEQEERGQR.R + Deamidated (NQ)	33	Arachis
			R.VLLEENAGGEQEERGQR.R + Deamidated (NQ)	41	Arachis
			R.CLQSCQQEPDDLKQK.A + Propionamide (K)	40	Arachis
			K.NPQLQDLDMMLTCVEIK.E	72	Arachis
			K.NPQLQDLDMMLTCVEIK.E	67	Arachis
			K.NPQLQDLDMMLTCVEIK.E + Oxidation (M)	105	Arachis
			K.NPQLQDLDMMLTCVEIK.E + Oxidation (M)	107	Arachis
			K.AMVIVVVNKGTGNLELVAVR.K	103	Arachis
			K.AMVIVVVNKGTGNLELVAVR.K	70	Arachis
			K.AMVIVVVNKGTGNLELVAVR.K + Oxidation (M)	46	Arachis
			R.EGEQEWGTPGSEVREETSR.N	26	Arachis
			R.EGEQEWGTPGSHVREETSR.N	25	Arachis
			K.KNPQLQDLDMMLTCVEIK.E	58	Arachis
			K.ISMPVNTPGQFEDFFPASSR.D	68	Arachis
			K.ISMPVNTPGQFEDFFPASSR.D	104	Arachis
			K.ISMPVNTPGQFEDFFPASSR.D + Deamidated (NQ)	75	Arachis
			K.ISMPVNTPGQFEDFFPASSR.D + Oxidation (M)	69	Arachis
			K.ISMPVNTPGQFEDFFPASSR.D + Oxidation (M)	89	Arachis
			R.EQEWEEEEEDEEEEGSNR.E	72	Arachis hypogaea
			R.EQEWEEEEEDEEEEGSNR.E	104	Arachis hypogaea
			R.REQEWEEEEEDEEEEGSNR.E	78	Arachis hypogaea
			R.REQEWEEEEEDEEEEGSNR.E	96	Arachis hypogaea
			R.VAKISMPVNTPGQFEDFFPASSR.D	37	Arachis
			R.VAKISMPVNTPGQFEDFFPASSR.D	58	Arachis
			R.VAKISMPVNTPGQFEDFFPASSR.D + Oxidation (M)	49	Arachis
			R.VAKISMPVNTPGQFEDFFPASSR.D + Oxidation (M)	87	Arachis
			R.VAKISMPVNTPGQFEDFFPASSR.D + Propionamide (K)	65	Arachis
			R.VAKISMPVNTPGQFEDFFPASSR.D + Propionamide (K)	41	Arachis
			R.VAKISMPVNTPGQFEDFFPASSR.D + Deamidated (NQ); Propionamide (K)	61	Arachis
			K.SFNLDEGHALRIPSGFISYILNR.H	44	Arachis
			K.SFNLDEGHALRIPSGFISYILNR.H	42	Arachis
			R.EQEWEEEEEDEEEEGSNREVR.R + Deamidated (NQ)	26	Arachis hypogaea
			R.EQEWEEEEEDEEEEGSNREVR.R	51	Arachis hypogaea
			K.HADADNILVIQQGQATVTVANGNNRK.S	86	Arachis
			K.HADADNILVIQQGQATVTVANGNNRK.S	41	Arachis
			K.HADADNILVIQQGQATVTVANGNNRK.S + Deamidated (NQ)	86	Arachis
			K.GSEEEDITNPINLRDGEPDLSNNFGR.L	26	Arachis
			K.GSEEEDITNPINLRDGEPDLSNNFGR.L + Deamidated (NQ)	30	Arachis
			K.GSEEEDITNPINLRDGEPDLSNNFGR.L	35	Arachis
			K.GSEEEGDITNPINLREGEPDLSNNFGK.L	80	Arachis
			K.GSEEEGDITNPINLREGEPDLSNNFGK.L	35	Arachis
			K.NPQLQDLDMMLTCVEIKEGALMLPHFNSK.A	32	Arachis
			K.NPQLQDLDMMLTCVEIKEGALMLPHFNSK.A	77	Arachis
			K.NPQLQDLDMMLTCVEIKEGALMLPHFNSK.A + Deamidated (NQ)	37	Arachis
			K.NPQLQDLDMMLTCVEIKEGALMLPHFNSK.A + Deamidated (NQ); Oxidation (M)	35	Arachis
			K.NPQLQDLDMMLTCVEIKEGALMLPHFNSK.A + Deamidated (NQ); Oxidation (M)	53	Arachis
			K.ISMPVNTPGQFEDFFPASSRDQSSYLQGFSR.N + Deamidated (NQ)	25	Arachis
	Allergen Ara h 1, clone P41B	Arachis hypogaea	K.AMVIVVVNK.G	54	Arachis
			LFEVKPDK.K	50	Not unique
			K.EHVQELTK.H	48	Not unique
			K.EHVeELTK.H	49	Not unique
			K.AMVIVVVNK.G + Oxidation (M)	38	Arachis
			R.SSDNEGVIVK.V	91	Arachis
			LFEVKPDKK.N	72	Not unique
			K.GTGNLELVAVR.K	102	Arachis
			R.NNPFYFPSR.R	33	Arachis
			LFEVKPDKK.N + Propionamide (K)	53	Not unique
			R.SSENNEGVIVK.V + Deamidated (NQ)	36	Arachis
			QFQNLQNHR.I	39	Arachis
			QFQNLQNHR.I	77	Arachis
			K.GTGNLELVAVRK.E	37	Arachis
			K.SFNLDEGHALR.I	52	Arachis
			K.SFNLDEGHALR.I	62	Arachis
			R.DQSSYLQGFSR.N	50	Arachis
			R.DQSSYLQGFSR.N + Deamidated (NQ)	46	Arachis
			K.VSKEHVQELTK.H	68	Arachis
			K.VSKEHVQELTK.H	96	Arachis
			K.VSKEHVeELTK.H	80	Arachis
			K.VSKEHVeELTK.H	48	Arachis
			R.EGEPDLSNNFGK.L	37	Arachis
			R.EGEPDLSNNFGK.L + Deamidated (NQ)	48	Arachis
			K.EHVQELTKHAK.S	29	Arachis
			R.DGEPDLSNNFGR.L	58	Arachis
			K.EGALMLPHFNSK.A	26	Arachis
			K.EGALMLPHFNSK.A + Deamidated (NQ)	33	Arachis
			K.EGALMLPHFNSK.A + Oxidation (M)	49	Arachis
			R.SSDNEGVIVKVSK.E	30	Arachis
			K.VSKEHVQELTK.H + Propionamide (K)	50	Arachis
			K.VSKEHVQELTK.H + Propionamide (K)	57	Arachis
			K.VSKEHVeELTK.H + Propionamide (K)	52	Arachis
			K.VSKEHVeELTK.H + Propionamide (K)	53	Arachis
			K.DLAFPGSGEQVEK.L	26	Arachis
			R.IPSGFISYILNR.H	39	Arachis
			R.IPSGFISYILNR.H	63	Arachis
			R.IPSGFISYILNR.H + Deamidated (NQ)	63	Arachis
			R.KSFNLDEGHALR.I	81	Arachis
			K.EHVQELTKHAK.S + Propionamide (K)	49	Arachis
			K.EHVeELTKHAK.S + Propionamide (K)	25	Arachis
			K.EHVeELTKHAK.S + Propionamide (K)	48	Arachis
			R.SKQFQNLQNHR.I	101	Arachis
			R.SKQFQNLQNHR.I	63	Arachis
			R.SKQFQNLQNHR.I + Deamidated (NQ)	62	Arachis
			R.SKQFQNLQNHR.I + Deamidated (NQ)	48	Arachis
			R.SRQFQNLQNHR.I	93	Arachis
			R.SRQFQNLQNHR.I	54	Arachis
			R.SRQFQNLQNHR.I + Deamidated (NQ)	37	Arachis
			R.SSDNEGVIVKVSK.E + Propionamide (K)	54	Arachis
			R.SSDNEGVIVKVSK.E + Propionamide (K)	72	Arachis
			R.KSFNLDEGHALR.I + Propionamide (K)	77	Arachis
			R.KSFNLDEGHALR.I + Propionamide (K)	74	Arachis
			R.SKQFQNLQNHR.I + Propionamide (K)	51	Arachis
			R.SKQFQNLQNHR.I + Propionamide (K)	48	Arachis
			R.SRQFQNLQNHR.I + Propionamide (N-term)	69	Arachis
			R.KSFNLDEGHALR.I + Propionamide (K); Propionamide (N-term)	50	Arachis
			R.KSFNLDEGHALR.I + Propionamide (K); Propionamide (N-term)	57	Arachis
			R.SKQFQNLQNHR.I + Propionamide (K); Propionamide (N-term)	32	Arachis
			R.SKQFQNLQNHR.I + Propionamide (K); Propionamide (N-term)	72	Arachis
			R.SKQFQNLQNHR.I + Propionamide (K); Propionamide (N-term)	56	Arachis
			R.EGEQEWGTPGSEVR.E	57	Arachis
			R.SSENNEGVIVKVSK.E + Propionamide (K)	62	Arachis
			R.EGEQEWGTPGSHVR.E	85	Arachis
			R.EGEQEWGTPGSHVR.E	53	Arachis
			R.VLLEENAGGEQEER.G	110	Arachis
			R.VLLEENAGGEQEER.G + Deamidated (NQ)	109	Arachis
			K.GSEEEDITNPINLR.D	80	Arachis
			K.GSEEEGDITNPINLR.E	81	Arachis
			K.GSEEEGDITNPINLR.E	58	Arachis
			R.IVQIEAKPNTLVLPK.H	27	Arachis
			R.IVQIEAKPNTLVLPK.H	43	Arachis
			R.IVQIEARPNTLVLPK.H	29	Arachis
			R.IVQIEARPNTLVLPK.H + Deamidated (NQ)	26	Arachis
			R.IVQIEARPNTLVLPK.H + Deamidated (NQ)	39	Arachis
			K.KGSEEEDITNPINLR.D	57	Arachis
			K.GSEEEGDITNPINLR.E + Propionamide (N-term)	78	Arachis
			R.RVLLEENAGGEQEER.G	75	Arachis
			R.RVLLEENAGGEQEER.G	83	Arachis
			R.RVLLEENAGGEQEER.G + Deamidated (NQ)	54	Arachis
			R.IVQIEAKPNTLVLPK.H + Propionamide (K)	61	Arachis
			R.IVQIEAKPNTLVLPK.H + Propionamide (N-term)	25	Arachis
			R.NTLEAAFNAEFNEIR.R	61	Arachis
			R.NTLEAAFNAEFNEIR.R	132	Arachis
			K.KGSEEEGDITNPINLR.E	154	Arachis
			K.KGSEEEGDITNPINLR.E	47	Arachis
			K.QAKDLAFPGSGEQVEK.L + Propionamide (K)	65	Arachis
			K.DLAFPGSGEQVEKLIK.N + Propionamide (K)	29	Arachis
			K.DLAFPGSGEQVEKLIK.N + Propionamide (K)	45	Arachis
			R.IFLAGDKDNVIDQIEK.Q	106	Arachis
			R.IFLAGDKDNVIDQIEK.Q	73	Arachis
			R.IFLAGDKDNVIDQIEK.Q + Deamidated (NQ)	43	Arachis
			R.IFLAGDKDNVIDQIEK.Q + Propionamide (K)	26	Arachis
			R.IFLAGDKDNVIDQIEK.Q + Propionamide (K)	59	Arachis
			R.NTLEAAFNAEFNEIRR.V	51	Arachis
			R.NTLEAAFNAEFNEIRR.V	45	Arachis
			R.NTLEAAFNAEFNEIRR.V + Deamidated (NQ)	42	Arachis
			R.CLQSCQQEPDDLKQK.A	40	Arachis
			R.CLQSCQQEPDDLKQK.A	84	Arachis
			R.VLLEENAGGEQEERGQR.R	36	Arachis
			R.VLLEENAGGEQEERGQR.R	39	Arachis
			K.KGSEEEGDITNPINLR.E + Propionamide (K); Propionamide (N-term)	97	Arachis
			R.VLLEENAGGEQEERGQR.R + Deamidated (NQ)	33	Arachis
			R.VLLEENAGGEQEERGQR.R + Deamidated (NQ)	41	Arachis
			R.CLQSCQQEPDDLKQK.A + Propionamide (K)	40	Arachis
			K.NPQLQDLDMMLTCVEIK.E	72	Arachis
			K.NPQLQDLDMMLTCVEIK.E	67	Arachis
			K.NPQLQDLDMMLTCVEIK.E + Oxidation (M)	105	Arachis
			K.NPQLQDLDMMLTCVEIK.E + Oxidation (M)	107	Arachis
			K.AMVIVVVNKGTGNLELVAVR.K	103	Arachis
			K.AMVIVVVNKGTGNLELVAVR.K	70	Arachis
			K.AMVIVVVNKGTGNLELVAVR.K + Oxidation (M)	46	Arachis
			R.EGEQEWGTPGSEVREETSR.N	26	Arachis
			R.EGEQEWGTPGSHVREETSR.N	25	Arachis
			K.KNPQLQDLDMMLTCVEIK.E	58	Arachis
			K.ISMPVNTPGQFEDFFPASSR.D	68	Arachis
			K.ISMPVNTPGQFEDFFPASSR.D	104	Arachis
			K.ISMPVNTPGQFEDFFPASSR.D + Deamidated (NQ)	75	Arachis
			K.ISMPVNTPGQFEDFFPASSR.D + Oxidation (M)	69	Arachis
			K.ISMPVNTPGQFEDFFPASSR.D + Oxidation (M)	89	Arachis
			R.EQEWEEEEEDEEEEGSNR.E	72	Arachis
			R.EQEWEEEEEDEEEEGSNR.E	104	Arachis
			R.REQEWEEEEEDEEEEGSNR.E	78	Arachis hypogaea
			R.REQEWEEEEEDEEEEGSNR.E	96	Arachis hypogaea
			R.VAKISMPVNTPGQFEDFFPASSR.D	37	Arachis
			R.VAKISMPVNTPGQFEDFFPASSR.D	58	Arachis
			R.VAKISMPVNTPGQFEDFFPASSR.D + Oxidation (M)	49	Arachis
			R.VAKISMPVNTPGQFEDFFPASSR.D + Oxidation (M)	87	Arachis
			R.VAKISMPVNTPGQFEDFFPASSR.D + Propionamide (K)	65	Arachis
			R.VAKISMPVNTPGQFEDFFPASSR.D + Propionamide (K)	41	Arachis
			R.VAKISMPVNTPGQFEDFFPASSR.D + Deamidated (NQ); Propionamide (K)	61	Arachis
			K.SFNLDEGHALRIPSGFISYILNR.H	44	Arachis
			K.SFNLDEGHALRIPSGFISYILNR.H	42	Arachis
			R.EQEWEEEEEDEEEEGSNREVR.R + Deamidated (NQ)	26	Arachis hypogaea
			R.EQEWEEEEEDEEEEGSNREVR.R	51	Arachis hypogaea
			K.HADADNILVIQQGQATVTVANGNNRK.S	86	Arachis
			K.HADADNILVIQQGQATVTVANGNNRK.S	41	Arachis
			K.HADADNILVIQQGQATVTVANGNNRK.S + Deamidated (NQ)	86	Arachis
			K.GSEEEDITNPINLRDGEPDLSNNFGR.L	26	Arachis
			K.GSEEEDITNPINLRDGEPDLSNNFGR.L + Deamidated (NQ)	30	Arachis
			K.GSEEEDITNPINLRDGEPDLSNNFGR.L	35	Arachis
			K.GSEEEGDITNPINLREGEPDLSNNFGK.L	80	Arachis
			K.GSEEEGDITNPINLREGEPDLSNNFGK.L	35	Arachis
			K.NPQLQDLDMMLTCVEIKEGALMLPHFNSK.A	32	Arachis
			K.NPQLQDLDMMLTCVEIKEGALMLPHFNSK.A	77	Arachis
			K.NPQLQDLDMMLTCVEIKEGALMLPHFNSK.A + Deamidated (NQ)	37	Arachis
			K.NPQLQDLDMMLTCVEIKEGALMLPHFNSK.A + Deamidated (NQ); Oxidation (M)	35	Arachis
			K.NPQLQDLDMMLTCVEIKEGALMLPHFNSK.A + Deamidated (NQ); Oxidation (M)	53	Arachis
			K.ISMPVNTPGQFEDFFPASSRDQSSYLQGFSR.N + Deamidated (NQ)	25	Arachis
